# Supplementary material for: A multifunctional piezoelectric ZIF-8/PVDF fiber dressing for managing infected wound healing
Source: Royal Society of Chemistry journal article supplement (doi:10.1039/d5tb00678c), 2025-01-01
Supplement: d5tb00678c1.pdf [file d5tb00678c1.pdf]

## Supplementary material

### **A multifunctional piezoelectric ZIF-8/PVDF fiber dressing for managing infected wound healing**

Mengnan Chai<sup>1</sup>, Shengqian Wang<sup>2</sup>, Jiangshan Liu<sup>1</sup>, Yulun Liu<sup>3</sup>, Yufan Li<sup>1</sup>, Yubao Li<sup>1</sup>,  
Jidong Li<sup>1,\*</sup>

*<sup>1</sup>The Research Center for Nano-Biomaterials, Analytical and Testing Center, Sichuan  
University, Chengdu 610065, China*

*<sup>2</sup>School of Materials Science and Technology, China University of Geosciences, Beijing  
100083, China*

*<sup>3</sup>Key Laboratory for Thin Film and Microfabrication of Ministry of Education, School  
of Electronic Information and Electrical Engineering, Shanghai Jiao Tong University,  
Shanghai, 200240, China*

\* Corresponding author.

E-mail address: [nic1979@scu.edu.cn](mailto:nic1979@scu.edu.cn) (Jidong Li)

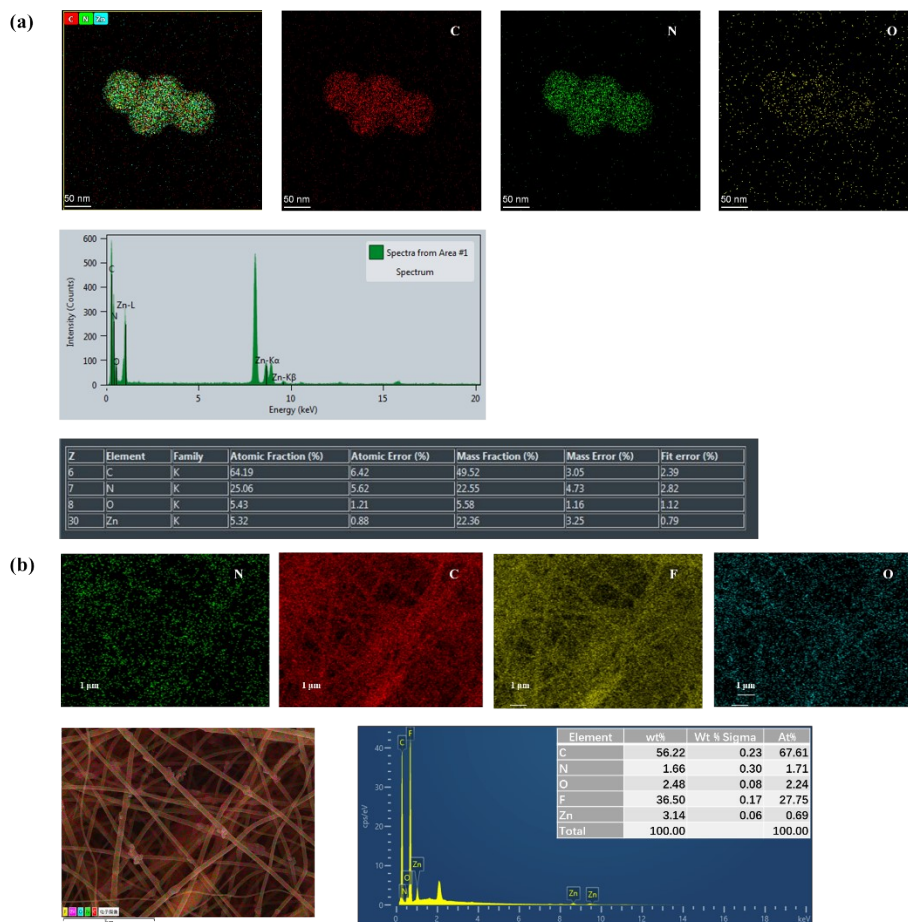

**Fig. S1** (a) EDS elemental mapping and spectra of corresponding elements of C, N, and O of ZIF-8 NPs. (b) EDS elemental mapping and spectra of corresponding elements of N, C, F, and O of 5 % ZIF-8/PVDF fiber film.

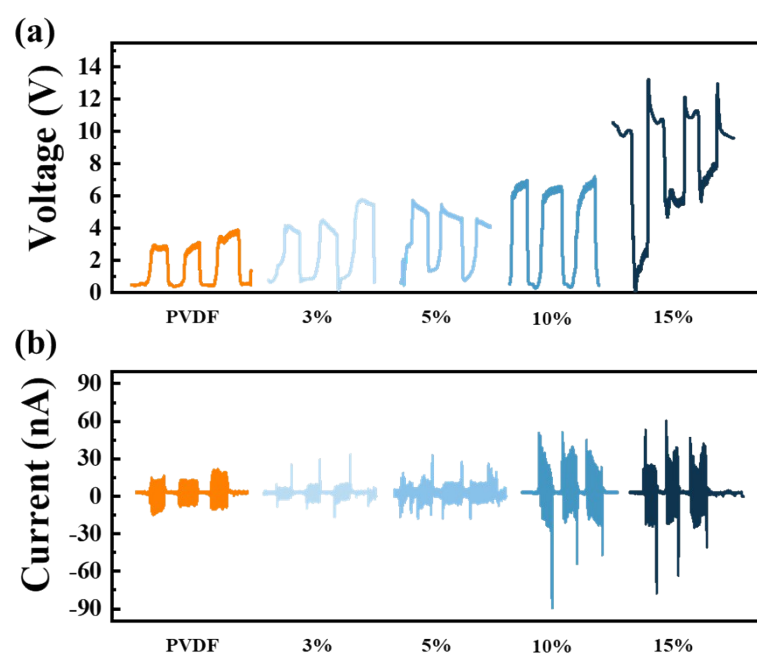

**Fig. S2** Values of (a)  $V_{oc}$  and (b)  $I_{sc}$  of PVDF and ZIF-8/PVDF fiber films under ultrasound.

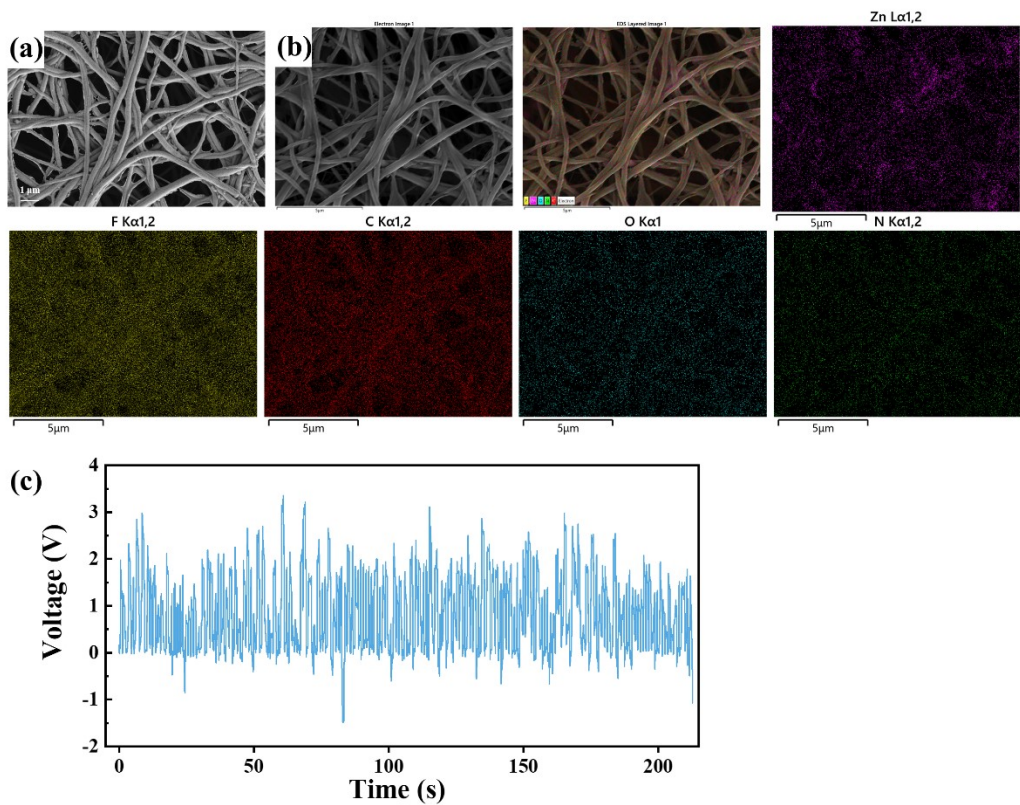

**Fig. S3** (a) The SEM images of 5% ZIF-8/PVDF fiber film after 14-day ultrasound. (b) Corresponding EDS elemental mapping of Zn, F, C, O, and N of 15% ZIF-8/PVDF fiber film 14-day ultrasound. (c) Voc of 5% ZIF-8/PVDF fiber films after 14-day ultrasound.

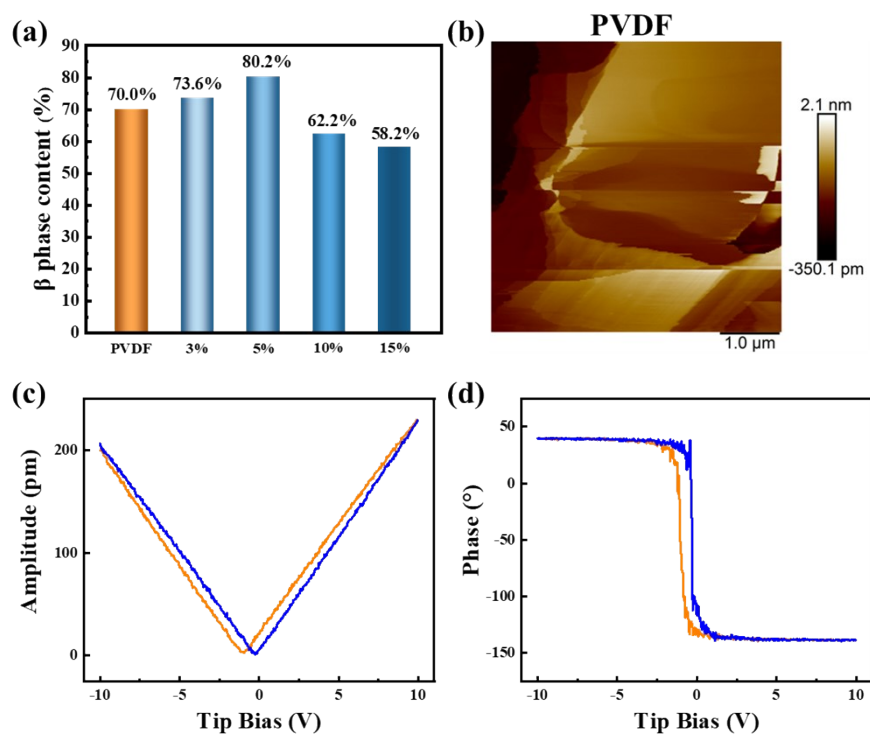

**Fig. S4** (a) The relative content of the  $\beta$  phase of PVDF and ZIF-8/PVDF fiber films. (b) PFM amplitude image, (c) The amplitude loop, and (d) The phase hysteresis loop of the PVDF fiber film.

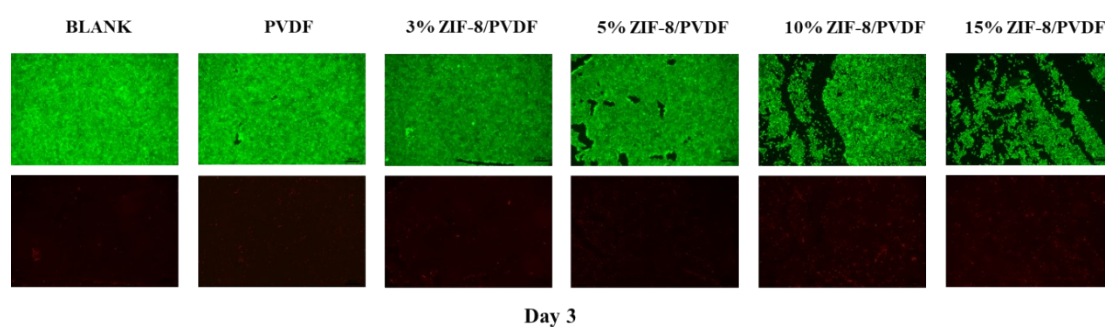

**Fig. S5** Live/dead cell staining images of cells cocultured with the different fiber films for 3 days.

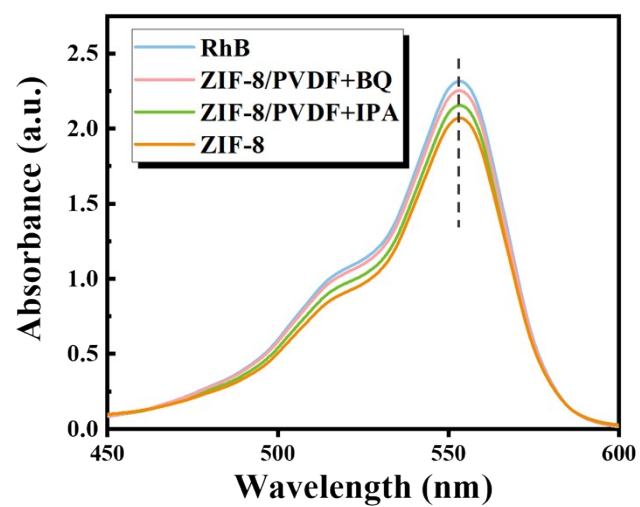

**Fig. S6** RhB degradation ratio over the 5% ZIF-8/PVDF fiber film in the presence of various radical scavengers at 5 min of ultrasound.

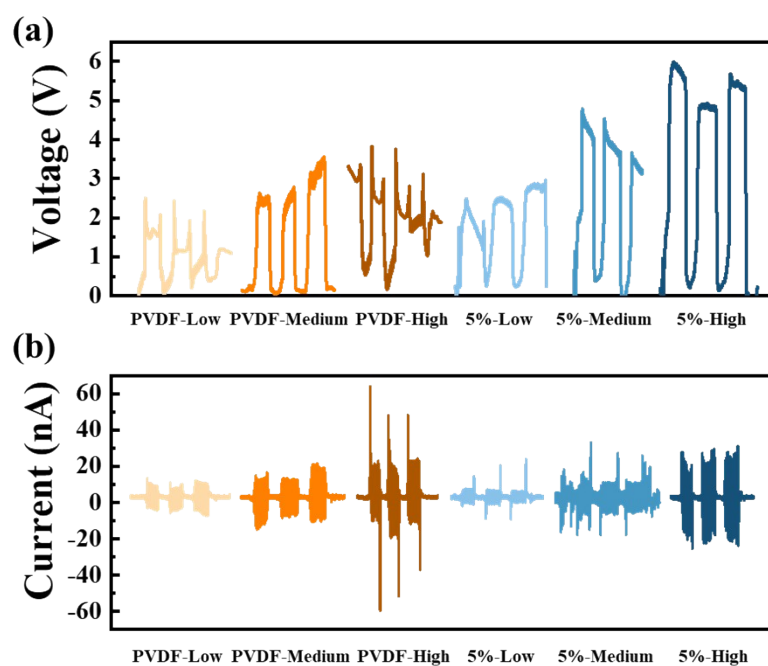

**Fig. S7** Values of (a)  $V_{oc}$  and (d)  $I_{sc}$  of PVDF and 5% ZIF-8/PVDF fiber films under different ultrasound frequencies.



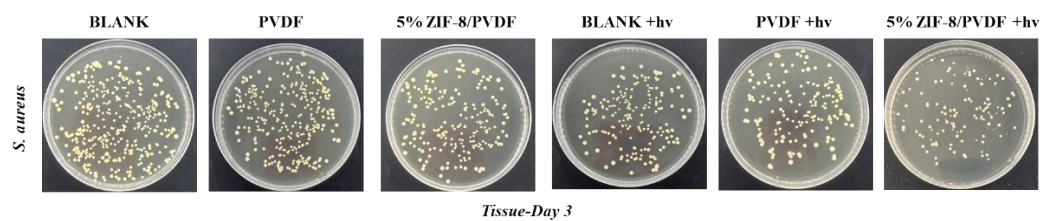

**Fig. S8** Plate photographs of the colonies formed by *S. aureus* on day 3.
